# Supplementary material for: Broad neutralization of SARS-CoV-2 variants, including omicron, following breakthrough infection with delta in COVID-19 vaccinated individuals
Source: bioRxiv or medRxiv preprint supplement (doi:10.1101/2021.12.01.21266982), 2021-12-21

## Supplemental information

### **Broad neutralization of SARS-CoV-2 variants, including omicron, following breakthrough infection with delta in COVID-19 vaccinated individuals**

Thomas Lechmere<sup>1</sup>#, Luke B. Snell<sup>2</sup>#, Carl Graham<sup>1</sup>, Jeffrey Seow<sup>1</sup>, Zayed A. Shalim<sup>1</sup>, Themoula Charalampous,<sup>2</sup> Adela Alcolea-Medina,<sup>2</sup> Rahul Batra,<sup>2</sup> Gaia Nebbia,<sup>2</sup> Jonathan D. Edgeworth<sup>2</sup>, Michael H. Malim<sup>1</sup>, Katie J. Doores<sup>1</sup>\*

<sup>1</sup>Department of Infectious Diseases, School of Immunology & Microbial Sciences, King's College London, London, UK.

<sup>2</sup>Centre for Clinical Infection and Diagnostics Research, Department of Infectious Diseases, Guy's and St Thomas' NHS Foundation Trust, London, UK.

# These authors contributed equally

\* To whom correspondence should be addressed: [katie.doores@kcl.ac.uk](mailto:katie.doores@kcl.ac.uk)

**Figure S1: A)** Comparison of the IgG and IgM ED<sub>50</sub> values against recombinant WT and delta Spikes for the AZD1222 and BNT162b2 vaccinated individuals experiencing breakthrough infection. Black horizontal lines show the geometric mean titres. **B)** Longitudinal IgG and IgM ED<sub>50</sub> against recombinant WT Spike in the BTI group. IgG is shown with a circle and IgM is shown with a triangle. Donors with IgM>IgG are shown in blue, donors who do not seroconvert are shown in red, donors with high Spike IgG but no N IgG at <7days POS are shown in orange, and donors with low Spike IgG at <7 days POS that rapidly increases are shown in yellow. **C)** Longitudinal IgG response to N protein. The dotted line represents the cut-off used to determine N seropositivity. **D)** Correlation between ED<sub>50</sub> against recombinant WT Spike in the BTI group and the optical density (OD) for N IgG binding. The horizontal dotted line represents the lowest dilution used in the neutralization assay. The vertical dotted line represents the cut-off used to determine N seropositivity. Data points are colour coded based on the days POS as indicated in the key. The red box highlights samples that have high IgG binding ED<sub>50</sub> but low IgG to N.

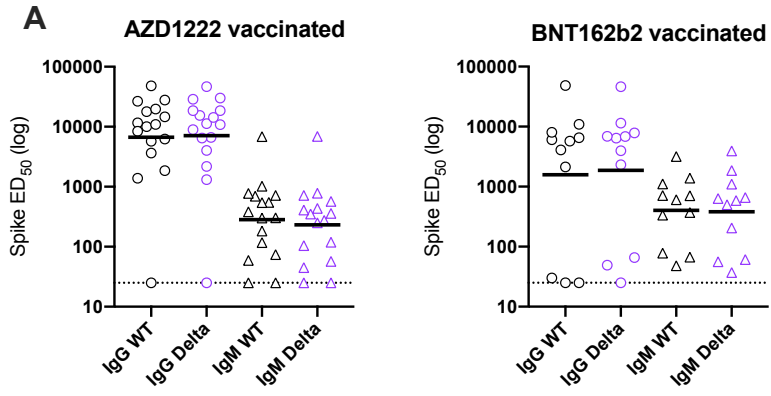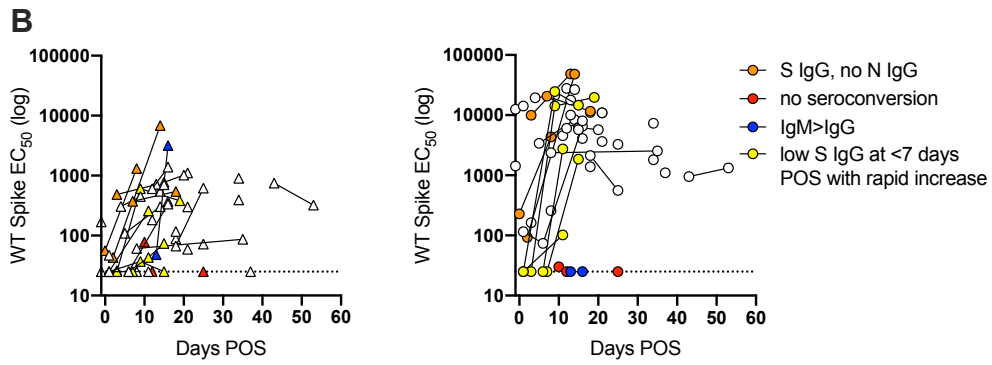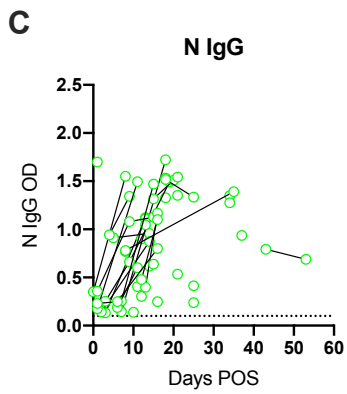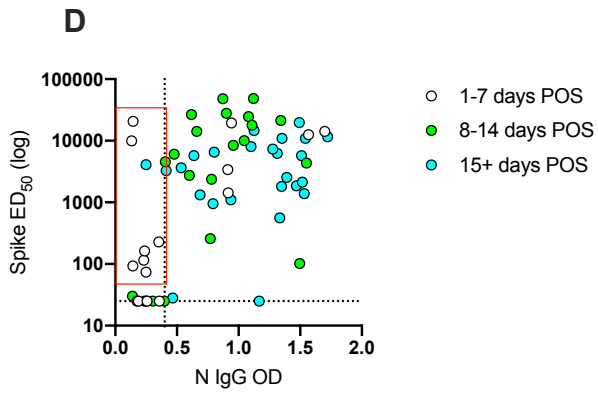

**Figure S2: A)** Neutralization potency of sera following breakthrough infection at different days post onset of symptoms (POS) against alpha, beta and mu pseudovirus particles. **B)** ID<sub>50</sub> of neutralization against WT (black), and VOCs alpha (blue), delta (purple), mu (red) and beta (orange) for sera from AZD1222 vaccinated or BNT162b2 individuals experiencing SARS-CoV-2 delta breakthrough infection. Black line shows the geometric mean titre.

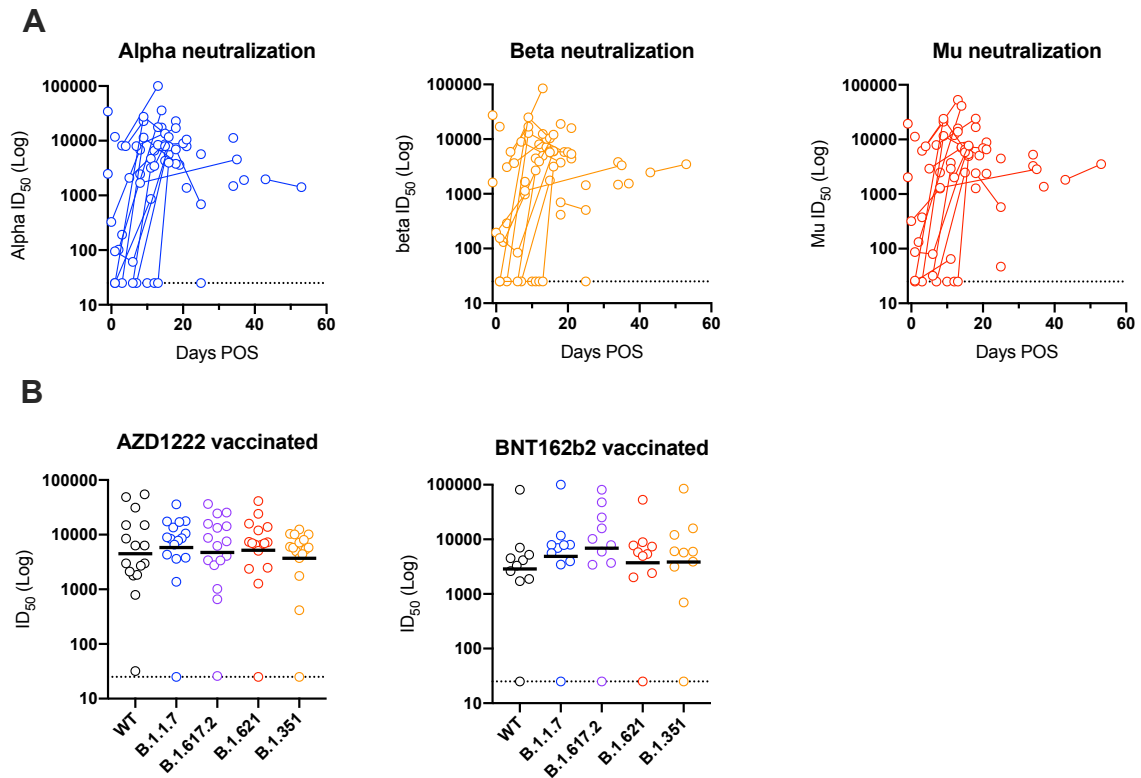

Supplement: Supplementary file [file media-1.pdf]
